# Supplementary material
Source: PubMed Central journal article supplement (PMC9178910)
Supplement: NIHMS1783391-supplement-figure_permissions.pdf [file NIHMS1783391-supplement-figure_permissions.pdf]

**Clinical Trials of Cell Therapy for Heart Failure: Recent Results  
Warrant Continued Research**

Roberto Bolli, M.D. and Xiang-Liang Tang, M.D

Reuse permission for Figure 1

Header

**Thank you for your order!**

Dear Xian-Liang Tang,

Thank you for placing your order through Copyright Clearance Center's RightsLink® service.

**Order Summary**

Licensee: University of Louisville  
Order Date: Feb 18, 2022  
Order Number: 5252140810768  
Publication: European Journal of Heart Failure  
Title: Bone marrow-derived mesenchymal stromal cell treatment in patients with ischaemic heart failure: final 4-year follow-up of the MSC-HF trial  
Type of Use: Journal/Magazine  
Order Total: 0.00 USD

View or print complete [details](#) of your order and the publisher's terms and conditions.

Sincerely,

Copyright Clearance Center

**Clinical Trials of Cell Therapy for Heart Failure: Recent Results  
Warrant Continued Research**

Roberto Bolli, M.D. and Xiang-Liang Tang, M.D

Reuse permission for Figures 2-4

Header

**Thank you for your order!**

Dear Xian-Liang Tang,

Thank you for placing your order through Copyright Clearance Center's RightsLink® service.

**Order Summary**

Licensee: University of Louisville  
Order Date: Feb 18, 2022  
Order Number: 5252140542961  
Publication: European Journal of Heart Failure  
Title: A Phase II study of autologous mesenchymal stromal cells and c-kit positive cardiac cells, alone or in combination, in patients with ischaemic heart failure: the CCTRN CONCERT-HF trial  
Type of Use: Journal/Magazine  
Order Total: 0.00 USD

View or print complete [details](#) of your order and the publisher's terms and conditions.

Sincerely,

Copyright Clearance Center
